# Supplementary material for: Temperature Influences the Composition and Cytotoxicity of Extracellular Vesicles in Staphylococcus aureus
Source: PubMed Central journal article supplement (PMC8510519; doi:10.1128/msphere.00676-21), 2021-10-06

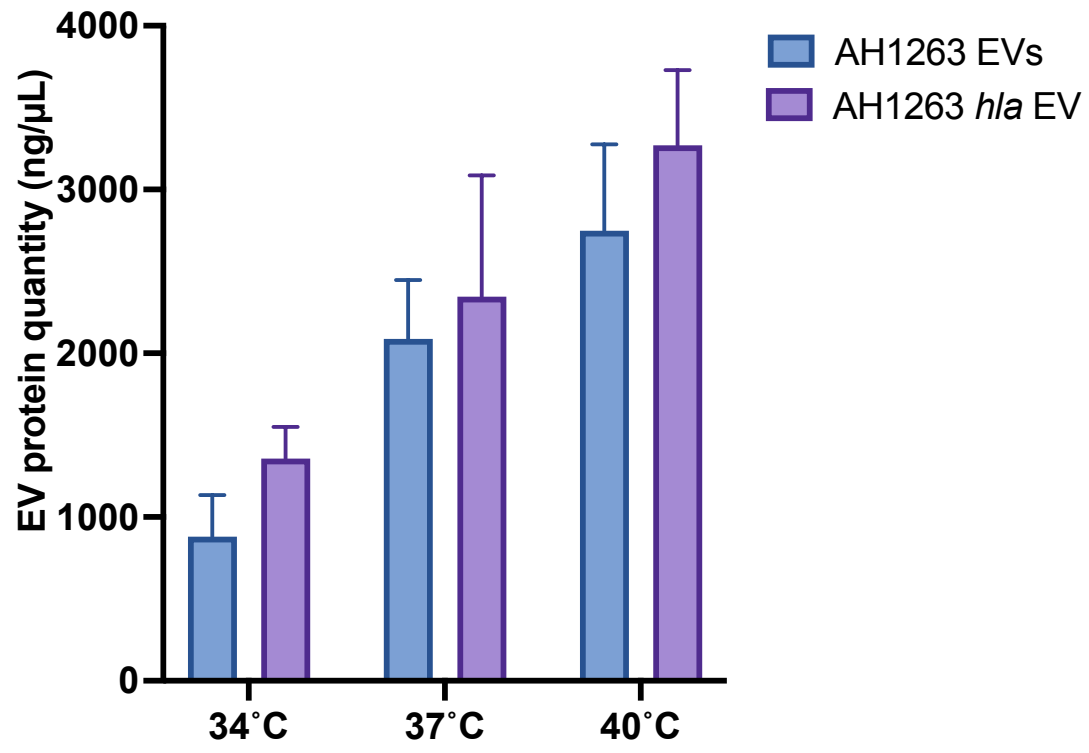

Supplement: msphere.00676-21-sf002.pdf [file msphere.00676-21-sf002.pdf]
